# Supplementary material
Source: Springer Nature journal article supplement (https://www.springermedizin.de/resource/supplementary/13690_2013_59_MOESM1_ESM.pdf/9422492)
Supplement: MOESM1 [file 9422492]

Medline Search n=393      EMBASE Search n=63  
CINAHL Search n =95      PsychInfo Search n=117  
Google Scholar n = 37      Web of Sciencen = 159  
Total: 864

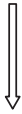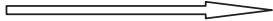

Exclusion of duplicates, n=141

Evaluation of Titles and  
abstracts,n=723

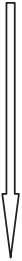

Review of reference list  
of identified systematic  
reviews, n=3

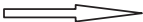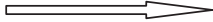

Exclusion criteria applied[n=671]  
Not an evaluation of mass media on physical  
activity, n=607;  
Systematic Reviews, n=32;  
Duplicates, n=2;  
Studies in children,n=20;  
Reliable effect measures not reported,n=10

Whole article review, n=55

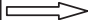

Exclusion criteria applied[n=32]  
Not an evaluation of mass media campaigns  
on physical activity, n=8; Duplicates, n=1;  
Studies in children, n=3;  
Reliable effect measures not reported, n=20

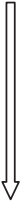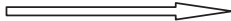

Point estimates of interest not reported, n=5  
Uncertainty measures not reported, n=9

Included in meta- analyses, n=9
